# Supplementary material for: Dual spike and nucleocapsid mRNA vaccination confer protection against SARS-CoV-2 Omicron and Delta variants in preclinical models
Source: PubMed Central journal article supplement (PMC9926941; doi:10.1126/scitranslmed.abq1945), 2022-09-14
Supplement: NIHMS1863403-supplement-STM-supplementary.pdf [file NIHMS1863403-supplement-STM-supplementary.pdf]

Supplementary Materials for  
**Dual spike and nucleocapsid mRNA vaccination confer protection against  
SARS-CoV-2 Omicron and Delta variants in preclinical models**

Renee L. Hajnik *et al.*

Corresponding author: Haitao Hu, haihu@utmb.edu; Kenneth S. Plante, ksplante@utmb.edu

*Sci. Transl. Med.* **14**, eabq1945 (2022)  
DOI: 10.1126/scitranslmed.abq1945

**The PDF file includes:**

Figs. S1 to S7  
Legend for data file S1

**Other Supplementary Material for this manuscript includes the following:**

Data file S1  
MDAR Reproducibility Checklist

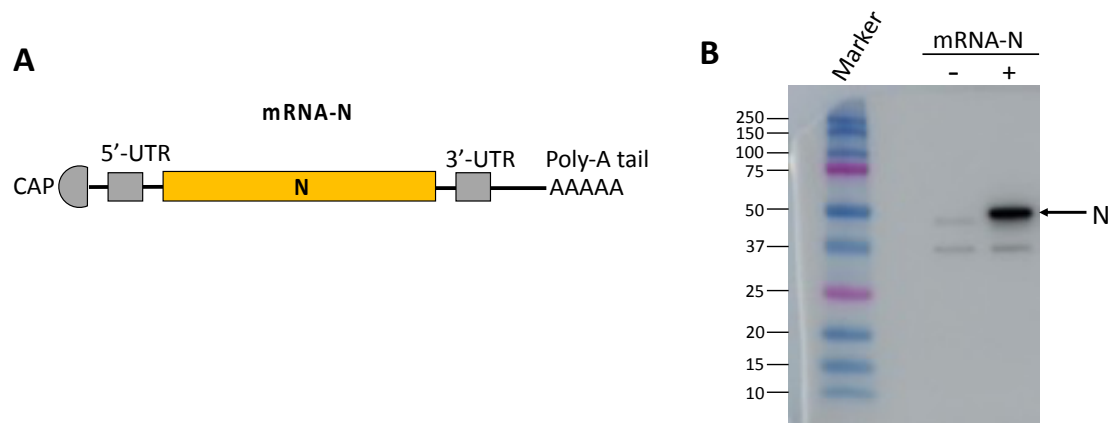

**Fig. S1. mRNA-N vaccine design and characterization.** (A) Structure of mRNA-N vaccine. Pseudouridine modified RNAs encoding full-length SARS-CoV-2 N protein were synthesized, followed by 5'-capping and 3' poly-A tailing. (B) A western blot was used to confirm SARS-CoV-2 Nucleocapsid (N) protein expression by mRNA-N. 293T cells were transfected with 2  $\mu$ g mRNA-N-LNP or phosphate-buffered saline for 18 hours. Total protein was extracted from cells for western blot analysis. SARS-CoV-2 N protein was detected using a specific anti-N antibody (MA5-29981).

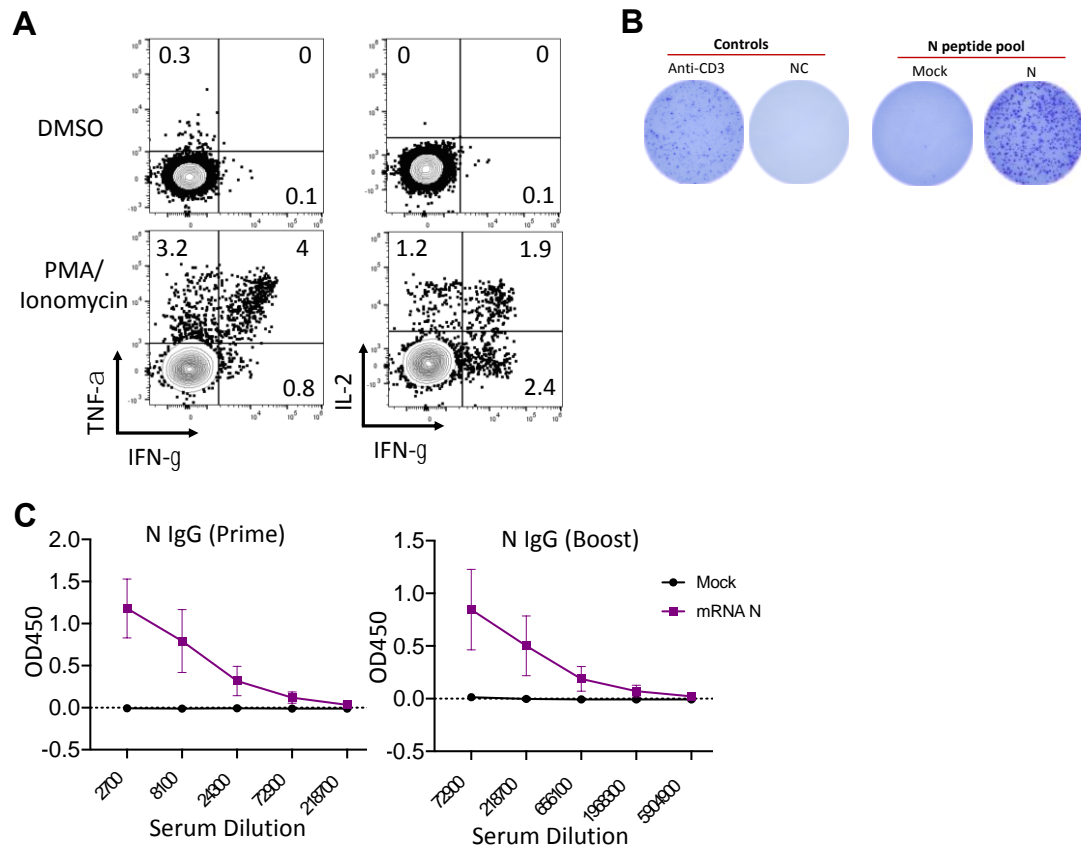

**Fig. S2. mRNA-N vaccine immunogenicity in mice.** (A) Representative flow cytometry plots are shown for cytokine expression in T cells following dimethyl sulfoxide (DMSO, negative control) or phorbol 12-myristate 13-acetate (PMA)/Ionomycin (positive control) stimulation. TNF- $\alpha$ , tumor necrosis factor- $\alpha$ ; IFN- $\gamma$ , interferon- $\gamma$ ; IL-2, interleukin-2. (B) Representative plots for detecting N-specific T cells in mouse spleen by IFN- $\gamma$  enzyme-linked immunosorbent spot (ELISPOT) assay are shown. Positive control (anti-CD3 stimulation) and negative control (NC, medium only) for the ELISPOT are also shown. Mock indicates DMSO. (C) Enzyme-linked immunosorbent assay (ELISA) measurement of N-specific binding IgG in serially diluted (1:3) serum samples ( $n = 7$  per group). Mean optical density (OD) values ( $\pm$ SD) for serum samples at indicated dilutions after prime (left) and booster (right) vaccination were shown for determination of IgG endpoint titers (EPTs).

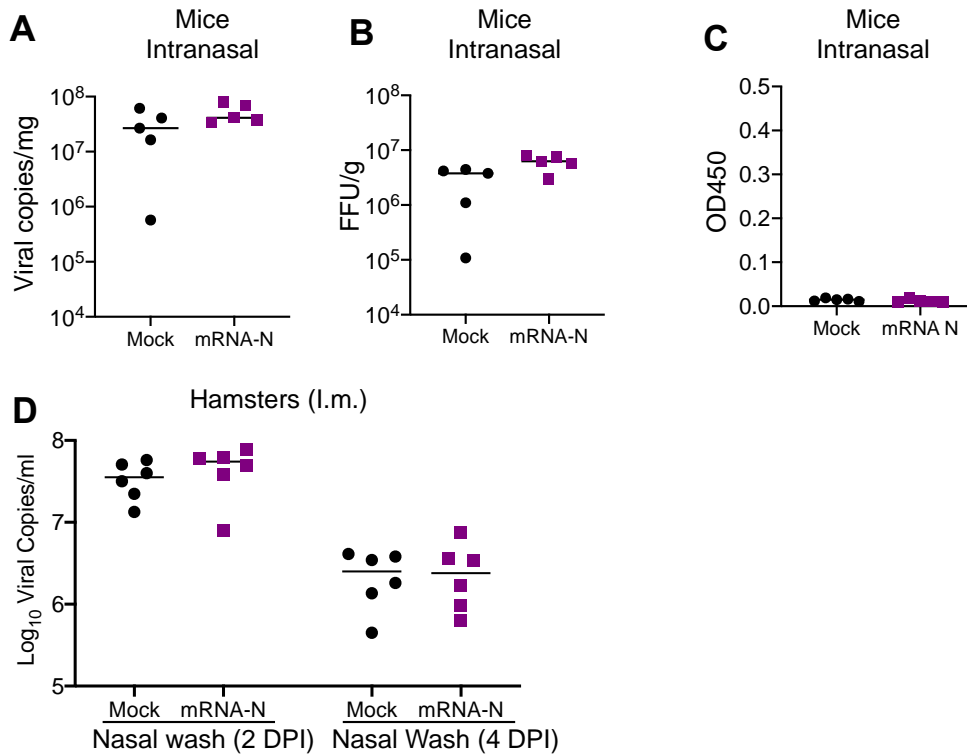

**Fig. S3. Analysis of mRNA-N-induced protection in mice and hamsters.** (A) Protection was analyzed in mice following intranasal (i.n.) vaccination. Two groups of BALB/c mice (n=5 per group) were i.n. immunized with PBS (mock) or mRNA-N vaccine (1  $\mu$ g) at week 0 and week 3, followed by intranasal challenge with a mouse-adapted SARS-CoV-2 strain [ $2 \times 10^4$  plaque forming units (pfu)]. 2 days post-infection (2 DPI), viral copies ( $\text{Log}_{10}$  copies/mg) in the mouse lung were analyzed by reverse transcription polymerase chain reaction (RT-PCR) and were compared between mock and vaccine group. (B) A comparison of viral titers in the mouse lungs [ $\text{Log}_{10}$  focus forming units (FFU)/g] is shown between the mock and vaccine groups following i.n. vaccination. (C) Serum antibody responses are shown in mice following intranasal (i.n.) vaccination. Serum samples were collected from the i.n. vaccinated mice 2 weeks after booster vaccination (prior to viral challenge). Serum N-specific binding IgG was measured by ELISA. OD450 values for individual serum samples (1:30 dilution) are shown. (D) A comparison of viral RNA copies in the nasal wash of mock

and mRNA-N-vaccinated hamsters is shown for samples collected on 2 DPI and 4 DPI (n = 6 per group). Horizontal bars indicate mean.

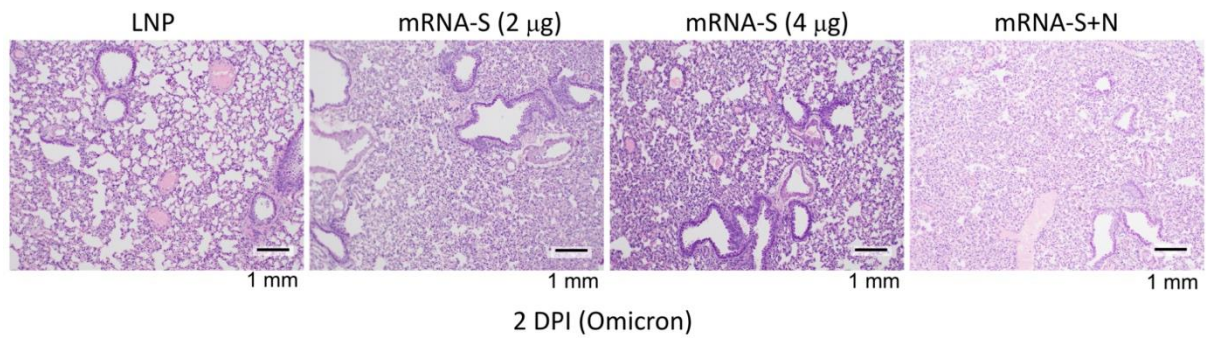

**Fig. S4. Histopathological analysis of lungs collected on 2 DPI from hamsters following Omicron challenge.** Lung tissues (2 DPI) were fixed and 5 µm sections cut from mock LNP, mRNA-S (2 µg), mRNA-S (4 µg), or mRNA-S+N-vaccinated hamsters and stained with hematoxylin & eosin (H&E). Lungs of hamsters from all four groups demonstrate normal bronchial, bronchiolar, and alveolar architecture. Scale bar of each image indicates 1 mm.

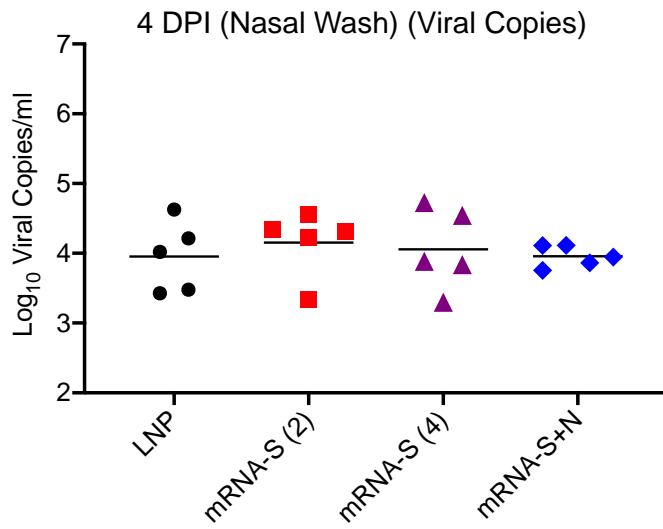

**Fig. S5. Viral RNA copies (Log<sub>10</sub>) are shown in the nasal washes of hamsters in different vaccination groups at 4 days after Omicron challenge. Horizontal bars indicate mean. n = 5 per group, as in Fig. 4.**

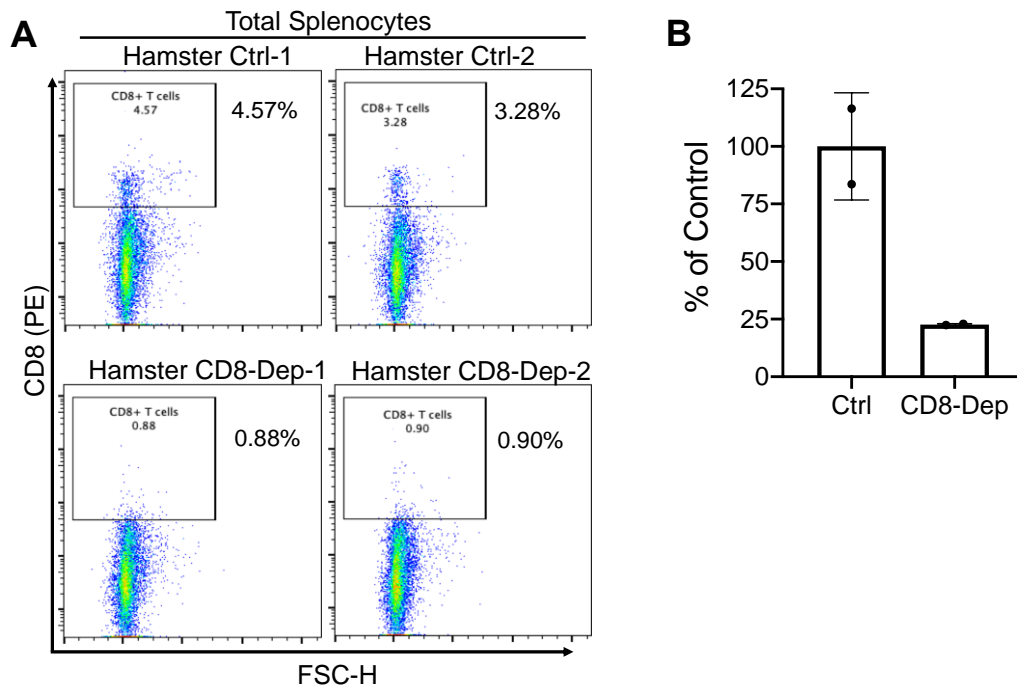

**Fig. S6. Confirmation of in vivo CD8<sup>+</sup> T cell depletion in hamsters.** Hamsters were intraperitoneally injected with either mouse anti-Rat CD8 $\beta$  antibody (175  $\mu$ g, eBio341, functional grade) or PBS as control on Day -6 and Day -3, as described in the Methods. Three days after second antibody injection (Day 0), splenocytes were isolated from the hamsters and stained with anti-CD8 $\beta$ -phycoerythrin (PE) (clone: eBio341). The percentage of CD8<sup>+</sup> T cells in splenocytes was examined by flow cytometry. **(A)** Shown are representative flow cytometry plots for CD8 staining in splenocytes of two control (Ctrl, top) and two CD8-Depleted (CD8-Dep, bottom) hamsters. % CD8<sup>+</sup> (or CD8<sup>hi</sup>) in splenocytes are shown. **(B)** Depletion efficiency was expressed as % CD8<sup>+</sup> T cells in splenocytes of the depleted hamsters relative to that of control hamsters (77% depletion). Data are presented as mean  $\pm$  SD.



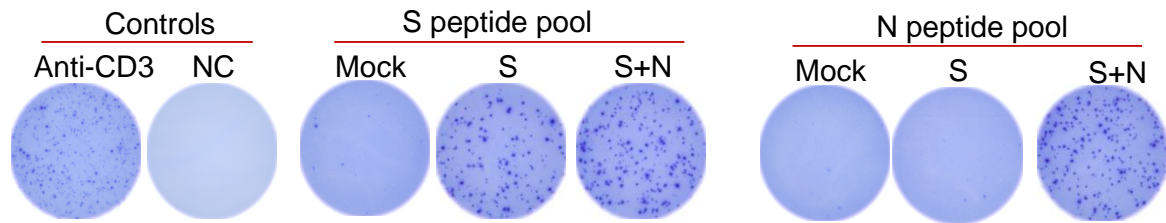

**Fig. S7. Immune analysis of mRNA-S and combination mRNA-S+N vaccination in mice.**

Shown are representative IFN- $\gamma$  ELISPOT for detecting S-specific and N-specific T cells in the mouse spleen following mock, mRNA-S, or combination mRNA-S+N vaccination (as described in Fig. 5). Positive control (anti-CD3 stimulation) and negative control (medium only) for the IFN- $\gamma$  ELISPOT are shown.

Data file S1. Raw, individual-level data for all experiments.
